# Supplementary material for: Nitrous oxide as second most important greenhouse gas in tropical peatlands
Source: Copernicus journal article supplement (doi:10.5194/egusphere-2024-24), 2024-01-24
Supplement: Supplementary file 1 [file egusphere-2024-24-supplement.pdf]

**This is meta info for the source data for Figures 2 and 3 in the article "Nitrous oxide as second most important greenhouse gas in tropical peatlands" by Dr. Jaan Pärn and colleagues compiled in 2024**

The following data were used:

**Start date**

**End date**

**Latitude:** Geographical latitude in degrees and its decimals

**Longitude:** Geographical longitude in degrees and its decimals

**SWC:** Soil water content in cubic meters of water per cubic meter of soil

**GPP: Gross primary production value derived from the MODIS satellite-based GPP product, expressed in mg CO2 per hour and meter square**

**R:** Average chamber-measured soil respiration value expressed in mg CO2 per hour and meter square.

**N2O:** Average chamber-measured methane emission value expressed in mg CO2 equivalents per hour and meter square. Negative (–) emission denotes net consumption of methane.

**CH4:** Average chamber-measured methane emission value expressed in mg CO2 equivalents per hour and meter square. Negative (–) emission denotes net consumption of methane.

**GHG:** Average greenhouse gas (GHG) exchange value expressed in mg CO2 equivalents per hour and meter square. The GHG exchange is calculated as GPP subtracted from the sum of chamber-measured R, N2O, and CH4. Negative (–) GHG denotes net greenhouse gas uptake

**SE:** Standard error of the mean GHG budget

| Start date | End date   | Latitude | Longitude | SWC      | GPP       | R        | N2O       | CH4      | GHG      | SE      |
|------------|------------|----------|-----------|----------|-----------|----------|-----------|----------|----------|---------|
| 20.06.2013 | 23.06.2013 | -1.2311  | 29.9605   | 0.643333 | 812.96286 | 1056.851 | 455.63815 | 46.23141 | 745.7576 | 25      |
| 21.06.2013 | 24.06.2013 | -1.2349  | 29.971943 | 0.755    | 763.34541 | 1470.585 | 14.023698 | 77.67875 | 798.9418 | 130.517 |
| 15.10.2013 | 18.10.2013 | 4.9908   | -52.4539  | 0.778122 | 967.5403  | 729.2479 | 0.2916233 | 152.5719 | 85.42891 | 31      |
| 20.10.2013 | 23.10.2013 | 5.1617   | -52.6517  | 0.610333 | 967.5403  | 598.3444 | 9.1161887 | 0.20384  | 359.8758 | 25      |
| 20.01.2016 | 23.01.2016 | 20.64314 | 96.891566 | 0.689286 | 499.99124 | 428.9159 | 123.3825  | 15.18699 | 67.49412 | 116.109 |

|            |            |          |           |          |           |          |           |          |          |         |
|------------|------------|----------|-----------|----------|-----------|----------|-----------|----------|----------|---------|
| 20.01.2016 | 23.01.2016 | 20.63207 | 96.905614 | 0.775833 | 496.17451 | 684.6226 | 37.409858 | 134.8384 | 360.6963 | 115.25  |
| 17.03.2017 | 20.03.2017 | 5.323896 | 115.67457 | 0.38     | 1736.6108 | 578.7395 | 288.44296 | 0.691319 | -868.737 | 88.1414 |
|            |            |          |           |          |           |          |           |          | -        |         |
| 20.03.2017 | 23.03.2017 | 5.310248 | 115.6492  | 0.623    | 1068.6836 | 661.9629 | 34.388906 | -0.49241 | 372.8242 | 23      |
|            |            |          |           |          |           |          |           |          | -        |         |
| 16.09.2019 | 19.09.2019 | -3.83454 | -73.31909 | 0.83     | 778.61231 | 343.2539 | 148.13163 | 33.81629 | 253.4104 | 37      |
| 22.09.2019 | 25.09.2019 | -3.85058 | -73.37891 | 0.21     | 0         | 308.6793 | 42.047803 | -2.4005  | 348.3266 | 248.586 |
| 05.01.2020 | 08.01.2020 | -3.85058 | -73.37891 | 0.24     | 0         | 297.5332 | 39.716711 | -2.64598 | 334.6039 | 69.8816 |
|            |            |          |           |          |           |          |           |          | -        |         |
| 11.01.2020 | 14.01.2020 | -3.83454 | -73.31909 | 0.87     | 470.72967 | 240.7506 | 11.343622 | 105.0528 | 113.5827 | 27      |
|            |            |          |           |          |           |          |           |          | -        |         |
| 23.09.2022 | 26.09.2022 | 1.452201 | 111.14412 | 0.7      | 1055.325  | 507.7083 | 0.5404063 | 7.226414 | 539.8499 | 266.314 |
| 25.09.2022 | 28.09.2022 | 1.399999 | 111.39428 | 0.48     | 215.64508 | 538.0501 | 68.119042 | 1.027182 | 391.5513 | 120.232 |
| 12.11.2022 | 21.12.2022 | 1.399999 | 111.39428 | 0.58     | 677.46905 | 778.3686 | 159.46283 | 4.06196  | 264.4243 | 25      |
|            |            |          |           |          |           |          |           |          | -        |         |
| 09.12.2022 | 19.12.2022 | 1.452201 | 111.14412 | 0.85     | 1101.1257 | 211.6583 | 0.0461285 | 9.991646 | 879.4297 | 25      |
